# Supplementary material for: Multi-Omic Analysis to Characterize Metabolic Adaptation of the E. coli Lipidome in Response to Environmental Stress
Source: MDPI journal article supplement (doi:10.3390/metabo12020171), 2022-02-11
Supplement: s1 [file s1]

## Supplemental Material

### Multi-omic Analysis to Characterize Metabolic Adaptation of the *E. coli* Lipidome in Response to Environmental Stress

Thomas Kralj<sup>1Δ</sup>, Madison Nuske<sup>1 Δ</sup>, Vinzenz Hofferek<sup>1</sup>, Marc-Antoine Sani<sup>1</sup>, Tzong-Hsien Lee<sup>2</sup>  
Frances Separovic<sup>1</sup>, Marie-Isabel Aguilar<sup>2</sup>, Gavin E Reid<sup>1,3\*</sup>

<sup>1</sup>School of Chemistry, Bio21 Molecular Science and Biotechnology Institute, The University of Melbourne, Melbourne, Victoria, 3010, Australia

<sup>2</sup>Department of Biochemistry and Molecular Biology, Monash University, Clayton VIC 3800, Australia

<sup>3</sup>Department of Biochemistry and Pharmacology, The University of Melbourne, Melbourne, Victoria, 3010, Australia

Keywords: *E.coli*; Lipidome; Proteome; Environmental Stress; Mass Spectrometry

Δ These authors contributed equally

\* Corresponding Author:

e-mail: [gavin.reid@unimelb.edu.au](mailto:gavin.reid@unimelb.edu.au)

## Supplemental Tables

**Supplemental Table S1.** Full names and abbreviations of the enzymes shown in Figures 5 and 6.

| Name                                                                                  | Abbreviation |
|---------------------------------------------------------------------------------------|--------------|
| Aerobic glycerol-3-phosphate dehydrogenase                                            | GlpD         |
| Cardiolipin synthase B                                                                | ClsB         |
| Bifunctional protein Aas [Includes: 2-acylglycerophosphoethanolamine acyltransferase] | Aas          |
| 1-acyl-sn-glycerol-3-phosphate acyltransferase                                        | PlsC         |
| Anaerobic glycerol-3-phosphate dehydrogenase subunit A                                | GlpA         |
| Anaerobic glycerol-3-phosphate dehydrogenase subunit B                                | GlpB         |
| Anaerobic glycerol-3-phosphate dehydrogenase subunit C                                | GlpC         |
| Cardiolipin synthase A                                                                | ClsA         |
| Cardiolipin synthase C                                                                | ClsC         |
| CDP-diacylglycerol pyrophosphatase                                                    | Cdh          |
| CDP-diacylglycerol--glycerol-3-phosphate 3-phosphatidyltransferase                    | PgsA         |
| CDP-diacylglycerol--serine O-phosphatidyltransferase                                  | PssA         |
| Diacylglycerol kinase                                                                 | DgkA         |
| Ethanolamine ammonia-lyase heavy chain                                                | EutB         |
| Ethanolamine ammonia-lyase light chain                                                | EutC         |
| Ethanolamine utilization protein EutA                                                 | EutA         |
| Glycerol-3-phosphate acyltransferase                                                  | PlsB         |
| Glycerol-3-phosphate dehydrogenase [NAD                                               | GpsA         |
| Glycerophosphodiester phosphodiesterase, cytoplasmic                                  | UgpQ         |
| Glycerophosphodiester phosphodiesterase, periplasmic                                  | GlpQ         |
| Lysophospholipase L2                                                                  | PldB         |
| Phosphate acyltransferase                                                             | PlsX         |
| Phosphatidate cytidyltransferase                                                      | CdsA         |
| Phosphatidylglycerophosphatase A                                                      | PgpA         |
| Phosphatidylglycerophosphatase B                                                      | PgpB         |
| Phosphatidylglycerophosphatase C                                                      | PgpC         |
| Phosphatidylserine decarboxylase proenzyme                                            | Psd          |
| Phospholipase A1                                                                      | PldA         |
| Probable glycerol-3-phosphate acyltransferase                                         | PlsY         |
| Thioesterase 1/protease 1/lysophospholipase L1                                        | TesA         |
| Uncharacterized protein YnbB                                                          | YnbB         |
| Cyclopropyl Fatty Acid Synthase                                                       | Cfa          |
| Acetyl-coenzyme A carboxylase carboxyl transferase subunit alpha                      | AccA         |
| Biotin carboxyl carrier protein of acetyl-CoA carboxylase                             | AccB         |

|                                                                                                           |      |
|-----------------------------------------------------------------------------------------------------------|------|
| 3-oxoacyl-[acyl-carrier-protein] synthase 2                                                               | FabF |
| Acetyl-coenzyme A carboxylase carboxyl transferase subunit beta                                           | AccD |
| 3-hydroxyacyl-[acyl-carrier-protein] dehydratase FabZ                                                     | FabZ |
| 3-hydroxydecanoyl-[acyl-carrier-protein] dehydratase                                                      | FabA |
| 3-oxoacyl-[acyl-carrier-protein] synthase 3                                                               | FabH |
| 3-oxoacyl-[acyl-carrier-protein] synthase 1                                                               | FabB |
| 3-oxoacyl-[acyl-carrier-protein] reductase FabG                                                           | FabG |
| Biotin carboxylase                                                                                        | AccC |
| Enoyl-[acyl-carrier-protein] reductase [NADH] FabI                                                        | FabI |
| Malonyl CoA-acyl carrier protein transacylase                                                             | FabD |
| Acetyl-coenzyme A synthetase                                                                              | Acs  |
| Acyl-coenzyme A dehydrogenase                                                                             | FadE |
| Acyl-CoA thioesterase 2                                                                                   | TesB |
| 3-ketoacyl-CoA thiolase FadA                                                                              | FadA |
| 2,3-dehydroadipyl-CoA hydratase                                                                           | PaaF |
| 3-phenylpropionate/cinnamic acid dioxygenase ferredoxin--NAD                                              | HcaD |
| 3-ketoacyl-CoA thiolase FadI                                                                              | FadI |
| Aldehyde-alcohol dehydrogenase [Includes: Alcohol dehydrogenase                                           | AdhE |
| Acetyl-CoA acetyltransferase                                                                              | AtoB |
| Alcohol dehydrogenase, propanol-preferring                                                                | AdhP |
| Fatty acid oxidation complex subunit alpha [Includes: Enoyl-CoA hydratase/3-hydroxybutyryl-CoA epimerase] | FadJ |
| Fatty acid oxidation complex subunit alpha [Includes: Enoyl-CoA hydratase/Delta]                          | FadB |
| Long-chain-fatty-acid--CoA ligase                                                                         | FadD |
| Probable acetyl-CoA acetyltransferase                                                                     | YqeF |
| Probable alcohol dehydrogenase                                                                            | YiaY |
| S-(hydroxymethyl)glutathione dehydrogenase                                                                | FrmA |
| Medium-chain fatty-acid--CoA ligase                                                                       | FadK |
| Long-chain acyl-CoA thioesterase                                                                          | FadM |
| Alpha-galactosidase                                                                                       | MelA |
| Aldehyde reductase YahK                                                                                   | YahK |
| Glycerate 2-kinase                                                                                        | GarK |
| Glycerate 3-kinase                                                                                        | GlxK |
| Glycerol dehydrogenase                                                                                    | GldA |
| Glycerol kinase                                                                                           | GlpK |
| PEP-dependent dihydroxyacetone kinase, ADP-binding subunit DhaL                                           | DhaL |
| PEP-dependent dihydroxyacetone kinase, dihydroxyacetone-binding subunit DhaK                              | DhaK |
| PEP-dependent dihydroxyacetone kinase, phosphoryl donor subunit DhaM                                      | DhaM |
| Beta-galactosidase                                                                                        | LacZ |

|                                     |      |
|-------------------------------------|------|
| Acyl-CoA thioester hydrolase        | YciA |
| 7alpha-hydroxysteroid dehydrogenase | HdhA |
| Thioredoxin/glutathione peroxidase  | BtuE |
| Disulfide-bond oxidoreductase YghU  | YghU |
| Catalase HP11                       | KatE |
| Peroxiredoxin OsmC                  | OsmC |
| Uncharacterized protein YnjA        | YnjA |
| Thiol peroxidase                    | Tpx  |
| Alkyl hydroperoxide reductase C     | AhpC |
| Probable cytochrome c peroxidase    | Ccp  |
| Catalase-peroxidase                 | KatG |
| Superoxide dismutase [Mn]           | SodA |
| Deferochelatase/peroxidase EfeB     | EfeB |
| Dye-decolorizing peroxidase YfeX    | YfeX |
| Adenine deaminase                   | AdeD |
| Superoxide dismutase [Fe]           | SodB |
| Superoxide dismutase [Cu-Zn]        | SodC |
| Hydroxylamine reductase             | Hcp  |
| Thioredoxin reductase               | TrxB |
| Glutathione S-transferase YfcF      | YfcF |
| Disulfide-bond oxidoreductase YfcG  | YfcG |
| Peroxiredoxin Bcp                   | Bcp  |
| Glutathione reductase               | Gor  |

**Supplemental Table S2.** Internal lipid standard composition and concentrations.

| Lipid Standards         | Cat No. | Lipid Class | Concentration (μM) |
|-------------------------|---------|-------------|--------------------|
| PC(15:0/18:1(d7))       | 791637C | PC          | 66.4               |
| PE(15:0/18:1(d7))       | 791638C | PE          | 843.9              |
| PS(15:0/18:1(d7))       | 791639C | PS          | 77.2               |
| PG(15:0/18:1(d7))       | 791640C | PG          | 209.4              |
| PI(15:0/18:1(d7))       | 791641C | PI          | 23.6               |
| PA(15:0/18:1(d7))       | 791642C | PA          | 87                 |
| LPC(18:1(d7))           | 791643C | Lyso PC     | 18.9               |
| LPE(18:1(d7))           | 791644C | Lyso PE     | 10.3               |
| LPS(13:0)               | 858140P | Lyso PS     | 20.9               |
| LPG(13:0)               | 858126C | Lyso PG     | 107.7              |
| PC(p18:0/18:1(d9))      | 852475C | PC          | 6.4                |
| PE(p18:0/18:1(d9))      | 852474C | PE          | 67.6               |
| MG(18:1(d7))            | 791646C | MG          | 27.5               |
| DG(15:0/18:1(d7))       | 791647C | DAG         | 17                 |
| TG(15:0/18:1(d7)/15:0)  | 791648C | TAG         | 24.6               |
| SM(d18:1/18:1(d9))      | 791649C | SM          | 27.1               |
| Cer(d18:1(d7)/15:0 )    | 860681P | Cer         | 18.8               |
| CE(18:1(d7))            | 791645C | ChlE        | 15.2               |
| Cholesterol(d7)         | 700041P | Chl         | 50.8               |
| CL(14:0/14:0/14:0/14:0) | 710332C | CL          | 39.2               |

PC: glycerophosphatidylcholine; PE: glycerophosphatidylethanolamine; PS: glycerophosphatidylserine; PG: glycerophosphatidylglycerol; PI: glycerophosphatidylinositol; PA: glycerophosphatidic acid; LPC: lyso-glycerophosphatidylserine; LPE: lyso-glycerophosphatidylethanolamine; LPS: lyso-glycerophosphatidylserine; LPG: lyso-glycerophosphatidylglycerol; PC(p): plasmalogen PC; PE(p): plasmalogen PE; MG: monoacylglycerol; DG: diacylglycerol; TG: triacylglycerol; SM: sphingomyelin; Cer: Ceramide; CE: cholesterol ester; CL: cardiolipin.

## Supplemental Figures

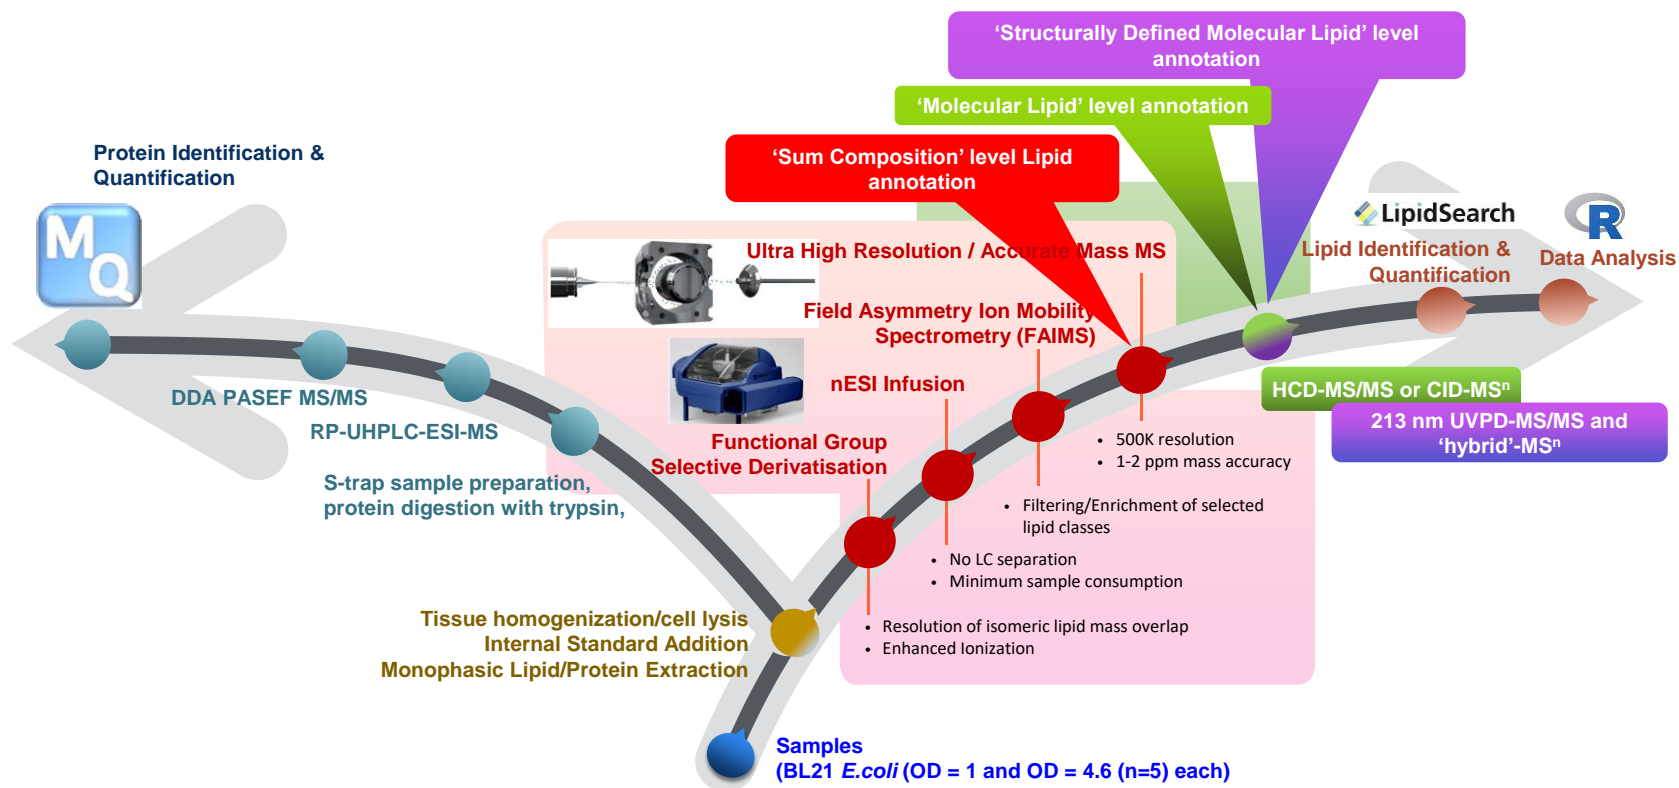

**Figure S1.** Schematic overview of the multi-omics workflow used for lipidome and proteome analysis.

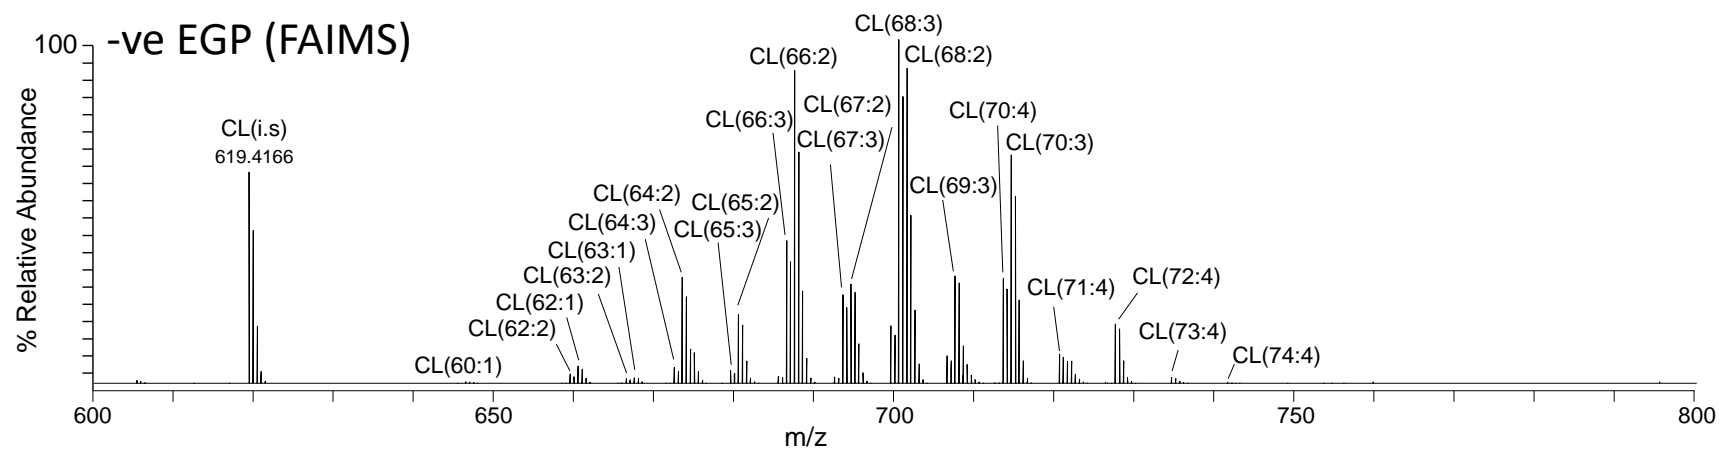

**Figure S2.** Negative ionization mode nESI-FAIMS-MS analysis ( $m/z$  600-800) of *E. coli* grown under EGP conditions.

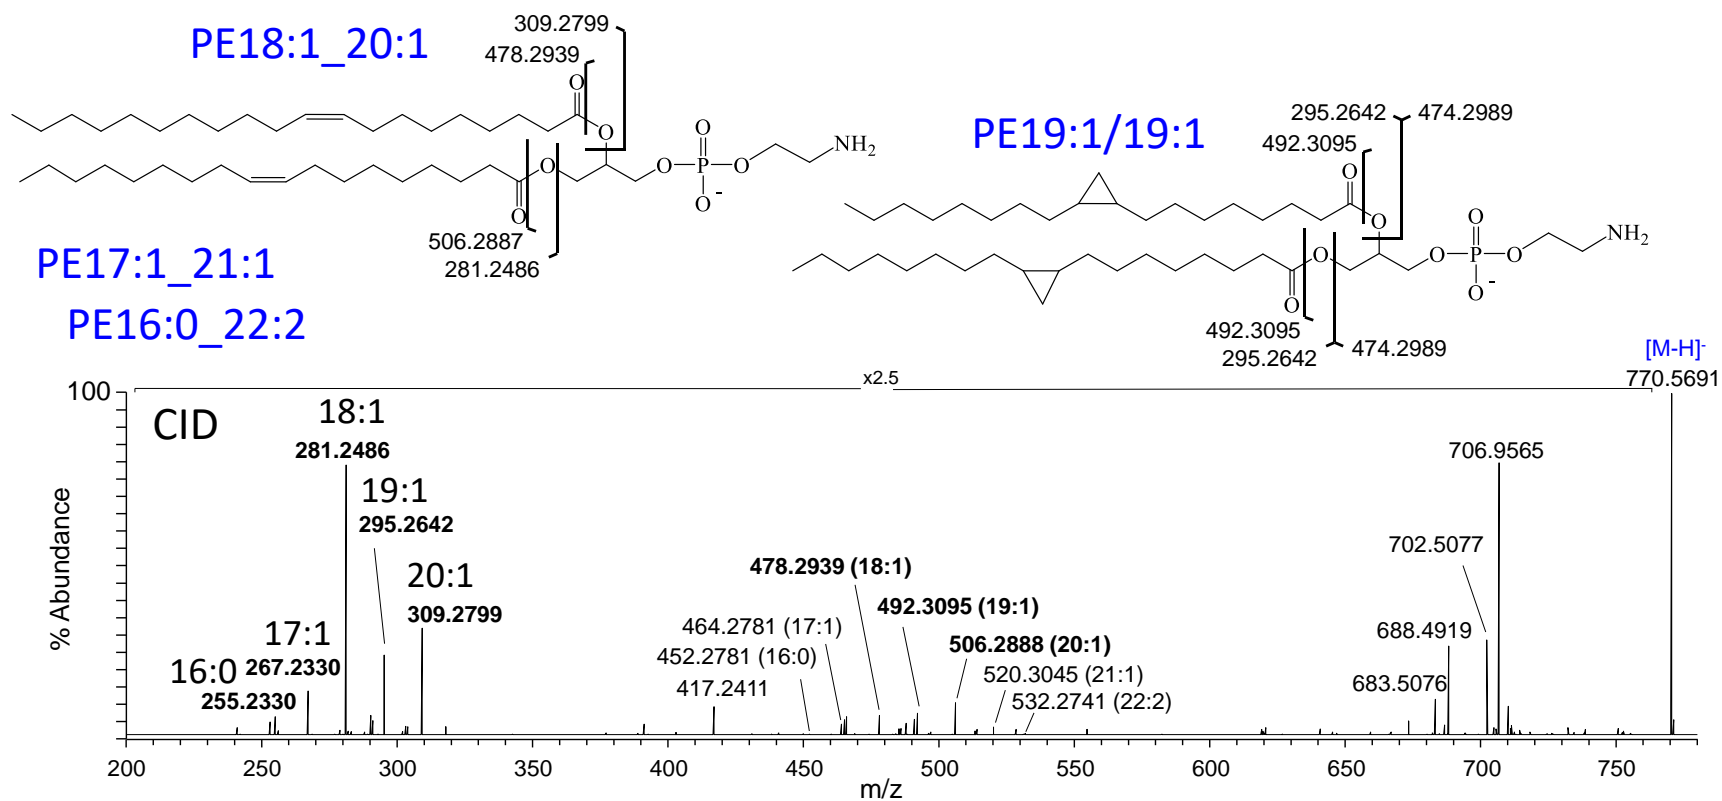

**Figure S3.** Negative ionization mode CID-MS/MS of the  $[M-H]^-$  precursor ion of PE(38:2) ( $m/z$  770.56) from *E. coli* grown under EGP conditions.



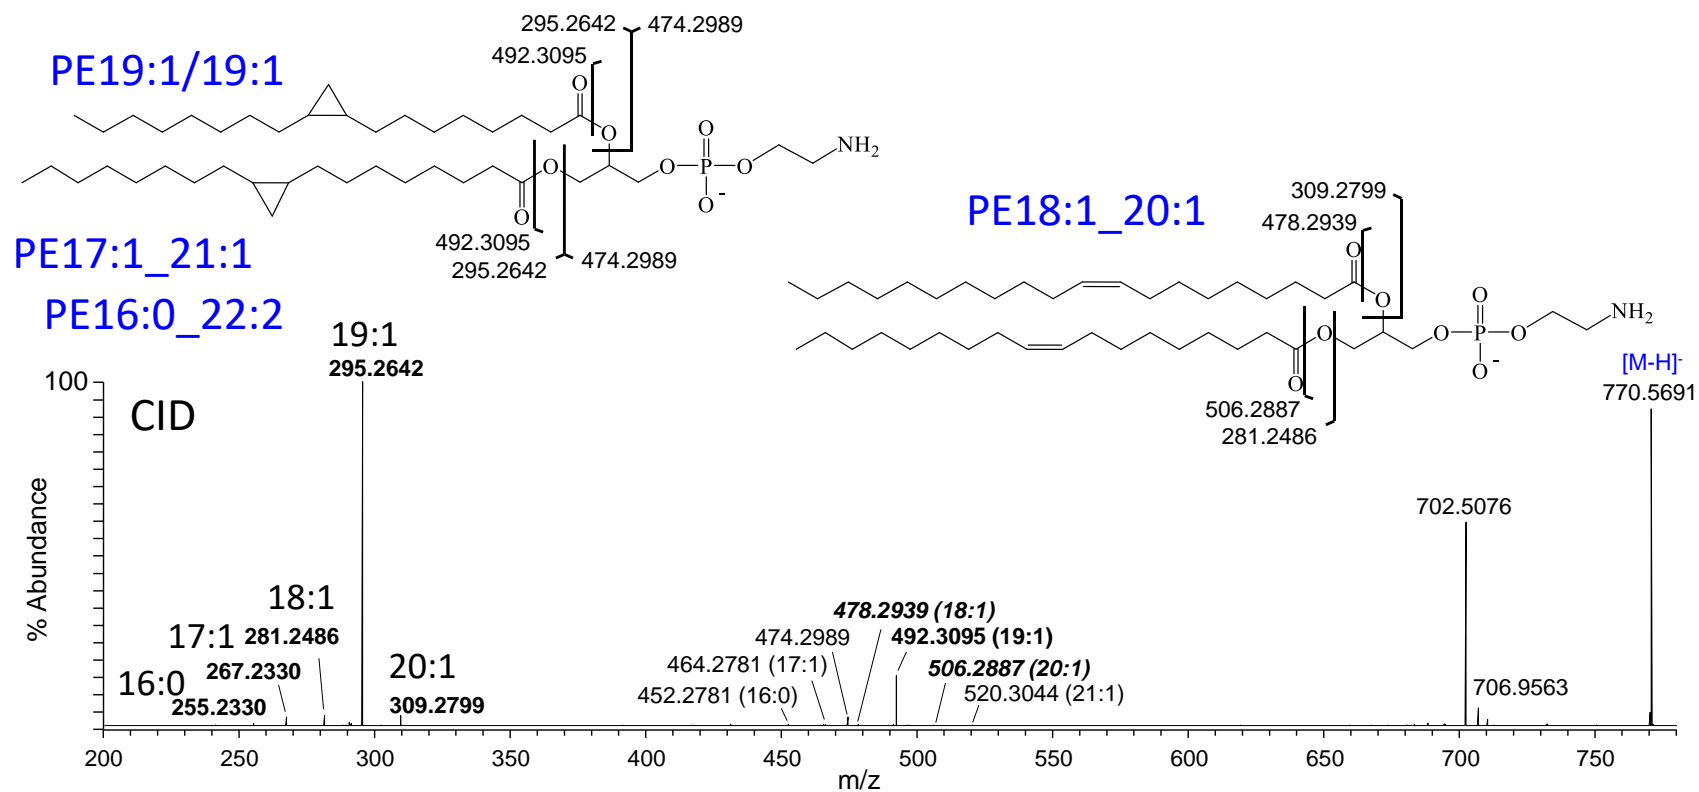

**Figure S4.** Negative ionization mode CID-MS/MS of the  $[M-H]^-$  precursor ion of PE(38:2) ( $m/z$  770.56) from *E. coli* grown under SGP conditions.

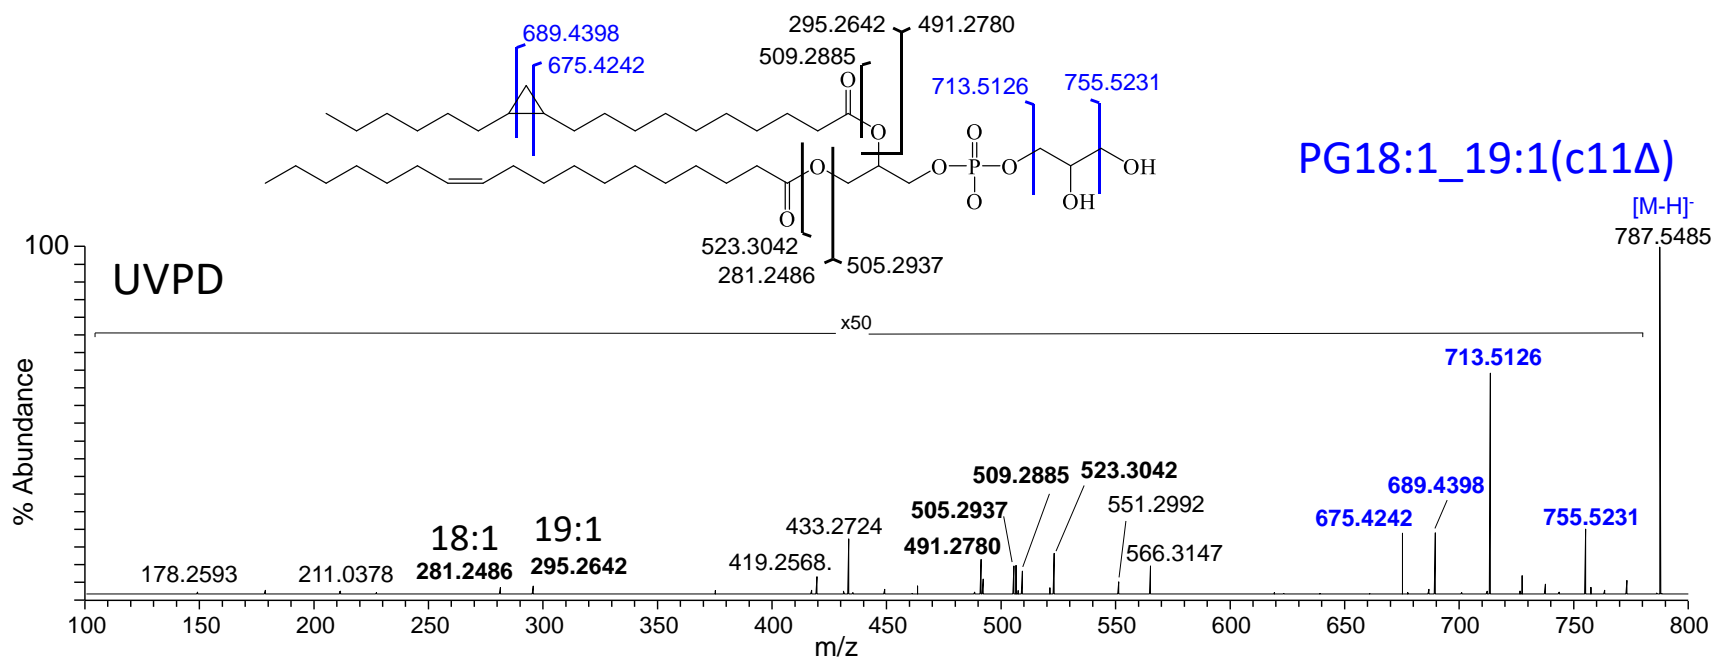

**Figure S5.** Negative ionization mode 213 nm UPVD-MS/MS for structural characterization of the [M-H]<sup>-</sup> precursor ion of *E. coli* PG(37:2) observed at m/z 787.5514 in Figure 2 under SGP conditions, as predominantly containing PE18:1\_19:1(c11Δ). The structure shown in the inset indicates the assigned bond cleavage sites for the major product ions. Product ions labelled in blue text are unique to UPVD.

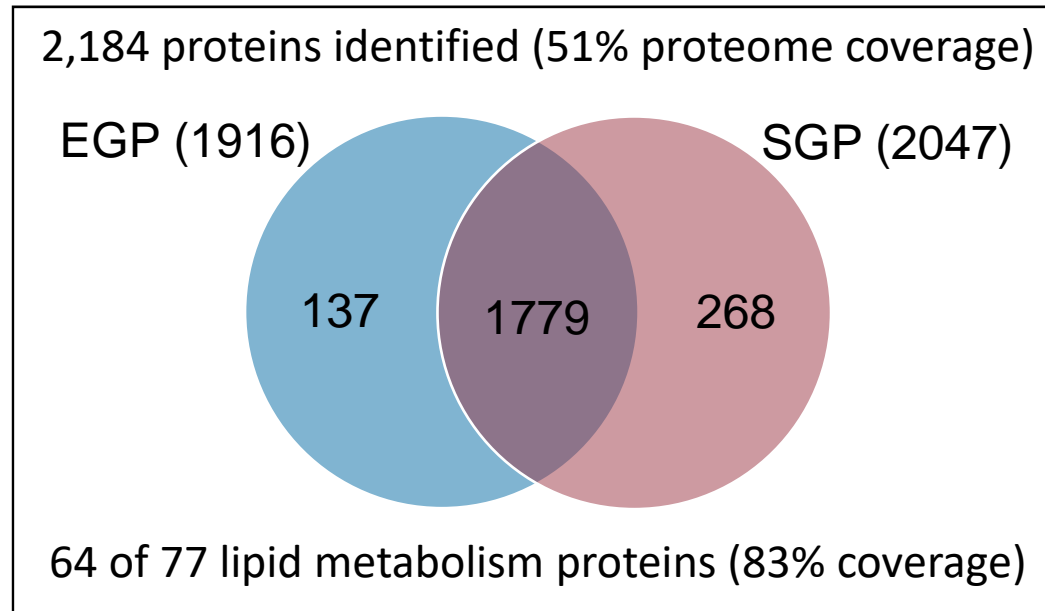

**Figure S6.** Venn diagram of the number of proteins identified via DDA-nUHPLC-MS/MS proteomic analysis of *E. coli* grown under EGP versus SGP conditions.
